# Supplementary material for: Attraction of Insects to Ornamental Lighting Used on Cultural Heritage Buildings: A Case Study in an Urban Area
Source: MDPI journal article supplement (doi:10.3390/insects13121153), 2022-12-14
Supplement: s1 [file s1]

**Table S1.** Taxonomic identification of the insects trapped throughout the experiment.

| Order           | Suborder        | Family                   | Genera/species      | Number of morpho-species |
|-----------------|-----------------|--------------------------|---------------------|--------------------------|
| Coleoptera (14) | Adephaga (2)    | Carabidae                |                     | 2                        |
|                 | Polyphaga (12)  | Bostrichidae             | <i>Schistocerus</i> | 1                        |
|                 |                 | Chrysomelidae            |                     | 1                        |
|                 |                 | Cryptophagidae           |                     | 1                        |
|                 |                 | Latridiidae              |                     | 2                        |
|                 |                 | Nitidulidae              | <i>Cybocephalus</i> | 1                        |
|                 |                 |                          |                     | 1                        |
|                 |                 | Ptiliidae                |                     | 1                        |
|                 |                 | Silvanidae               |                     | 1                        |
|                 |                 | Staphylinidae            |                     | 2                        |
|                 |                 | Tenebrionidae            |                     | 1                        |
|                 |                 |                          |                     |                          |
| Diptera (65)    | Nematocera (22) | Chironomidae             |                     | 3                        |
|                 |                 | Psychodidae              |                     | 4                        |
|                 |                 | Tipuloidea (Superfamily) |                     | 5                        |
|                 |                 |                          |                     | 10                       |
|                 | Schizophora (7) | Muscidae                 |                     | 6                        |
|                 |                 |                          |                     | 1                        |

|                     |                        |                  |                           |    |
|---------------------|------------------------|------------------|---------------------------|----|
|                     |                        |                  |                           | 36 |
| Hemiptera<br>(28)   | Cicadomorpha<br>(18)   | Cicadellidae     | <i>Cicadella viridis</i>  | 1  |
|                     |                        |                  |                           | 17 |
|                     | Heteroptera (5)        | Miridae          |                           | 5  |
|                     | Sternorrhyncha<br>(5)  | Aphididae        |                           | 5  |
| Hymenoptera<br>(14) | Apocrita (4)           | Chrysididae      |                           | 1  |
|                     |                        | Formicidae       |                           | 2  |
|                     |                        | Ichneumonidae    |                           | 1  |
|                     | Symphyta (4)           | Cephidae         |                           | 2  |
|                     |                        |                  |                           | 2  |
|                     |                        |                  |                           | 6  |
| Lepidoptera<br>(24) | Glossata (2)           | Noctuidae        | <i>Lacanobia oleracea</i> | 1  |
|                     |                        |                  | <i>Noctua pronuba</i>     | 1  |
|                     |                        |                  |                           | 21 |
| Neuroptera<br>(1)   | Hemerobiiformia<br>(1) | Chrysopidae      | <i>Chrysoperla carnea</i> | 1  |
| Psocoptera<br>(8)   | Psocomorpha (8)        |                  |                           | 8  |
| Thysanoptera<br>(3) |                        |                  |                           | 3  |
| Trichoptera<br>(3)  | Integripalpia (1)      | Lepidostomatidae | <i>Lepidostoma basale</i> | 1  |
|                     | Spicipalpia (1)        | Hidroptilidae    |                           | 1  |

---

Philopotamidae

*Wormaldia*

1

---

**Table S2.** Data used for the calculation of the Shannon-Wiener index.

| Order      | Morpho-species | Negative control (Unilluminated) |          |           |           | Positive control (Metal halide) |          |           |           | CromaLux          |          |           |           |
|------------|----------------|----------------------------------|----------|-----------|-----------|---------------------------------|----------|-----------|-----------|-------------------|----------|-----------|-----------|
|            |                | N° of individuals                | Pi       | lnPi      | Pi*lnPi   | N° of individuals               | Pi       | lnPi      | Pi*lnPi   | N° of individuals | Pi       | lnPi      | Pi*lnPi   |
| Coleoptera | Coleoptera 1   | 1                                | 8.77E-03 | -4.74E+00 | -4.15E-02 | 13                              | 9.15E-03 | -4.69E+00 | -4.30E-02 | 0                 | 0.00E+00 | 0.00E+00  | 0.00E+00  |
|            | Coleoptera 2   | 0                                | 0.00E+00 | 0.00E+00  | 0.00E+00  | 0                               | 0.00E+00 | 0.00E+00  | 0.00E+00  | 1                 | 3.85E-03 | -5.56E+00 | -2.14E-02 |
|            | Coleoptera 3   | 1                                | 8.77E-03 | -4.74E+00 | -4.15E-02 | 62                              | 4.37E-02 | -3.13E+00 | -1.37E-01 | 1                 | 3.85E-03 | -5.56E+00 | -2.14E-02 |
|            | Coleoptera 4   | 0                                | 0.00E+00 | 0.00E+00  | 0.00E+00  | 2                               | 1.41E-03 | -6.57E+00 | -9.25E-03 | 0                 | 0.00E+00 | 0.00E+00  | 0.00E+00  |
|            | Coleoptera 5   | 0                                | 0.00E+00 | 0.00E+00  | 0.00E+00  | 2                               | 1.41E-03 | -6.57E+00 | -9.25E-03 | 0                 | 0.00E+00 | 0.00E+00  | 0.00E+00  |
|            | Coleoptera 6   | 0                                | 0.00E+00 | 0.00E+00  | 0.00E+00  | 3                               | 2.11E-03 | -6.16E+00 | -1.30E-02 | 0                 | 0.00E+00 | 0.00E+00  | 0.00E+00  |
|            | Coleoptera 7   | 1                                | 8.77E-03 | -4.74E+00 | -4.15E-02 | 5                               | 3.52E-03 | -5.65E+00 | -1.99E-02 | 0                 | 0.00E+00 | 0.00E+00  | 0.00E+00  |
|            | Coleoptera 8   | 0                                | 0.00E+00 | 0.00E+00  | 0.00E+00  | 2                               | 1.41E-03 | -6.57E+00 | -9.25E-03 | 0                 | 0.00E+00 | 0.00E+00  | 0.00E+00  |
|            | Coleoptera 9   | 0                                | 0.00E+00 | 0.00E+00  | 0.00E+00  | 1                               | 7.04E-04 | -7.26E+00 | -5.11E-03 | 0                 | 0.00E+00 | 0.00E+00  | 0.00E+00  |
|            | Coleoptera 10  | 0                                | 0.00E+00 | 0.00E+00  | 0.00E+00  | 2                               | 1.41E-03 | -6.57E+00 | -9.25E-03 | 0                 | 0.00E+00 | 0.00E+00  | 0.00E+00  |
|            | Coleoptera 11  | 0                                | 0.00E+00 | 0.00E+00  | 0.00E+00  | 0                               | 0.00E+00 | 0.00E+00  | 0.00E+00  | 1                 | 3.85E-03 | -5.56E+00 | -2.14E-02 |
|            | Coleoptera 12  | 0                                | 0.00E+00 | 0.00E+00  | 0.00E+00  | 1                               | 7.04E-04 | -7.26E+00 | -5.11E-03 | 0                 | 0.00E+00 | 0.00E+00  | 0.00E+00  |
|            | Coleoptera 13  | 0                                | 0.00E+00 | 0.00E+00  | 0.00E+00  | 1                               | 7.04E-04 | -7.26E+00 | -5.11E-03 | 0                 | 0.00E+00 | 0.00E+00  | 0.00E+00  |
|            | Coleoptera 14  | 1                                | 8.77E-03 | -4.74E+00 | -4.15E-02 | 0                               | 0.00E+00 | 0.00E+00  | 0.00E+00  | 0                 | 0.00E+00 | 0.00E+00  | 0.00E+00  |
| Diptera    | Diptera 1      | 1                                | 8.77E-03 | -4.74E+00 | -4.15E-02 | 2                               | 1.41E-03 | -6.57E+00 | -9.25E-03 | 2                 | 7.69E-03 | -4.87E+00 | -3.74E-02 |
|            | Diptera 2      | 8                                | 7.02E-02 | -2.66E+00 | -1.86E-01 | 28                              | 1.97E-02 | -3.93E+00 | -7.74E-02 | 1                 | 3.85E-03 | -5.56E+00 | -2.14E-02 |
|            | Diptera 3      | 42                               | 3.68E-01 | -9.99E-01 | -3.68E-01 | 178                             | 1.25E-01 | -2.08E+00 | -2.60E-01 | 28                | 1.08E-01 | -2.23E+00 | -2.40E-01 |
|            | Diptera 4      | 1                                | 8.77E-03 | -4.74E+00 | -4.15E-02 | 4                               | 2.82E-03 | -5.87E+00 | -1.65E-02 | 0                 | 0.00E+00 | 0.00E+00  | 0.00E+00  |
|            | Diptera 5      | 1                                | 8.77E-03 | -4.74E+00 | -4.15E-02 | 20                              | 1.41E-02 | -4.26E+00 | -6.00E-02 | 3                 | 1.15E-02 | -4.46E+00 | -5.15E-02 |
|            | Diptera 6      | 0                                | 0.00E+00 | 0.00E+00  | 0.00E+00  | 21                              | 1.48E-02 | -4.21E+00 | -6.23E-02 | 1                 | 3.85E-03 | -5.56E+00 | -2.14E-02 |
|            | Diptera 7      | 0                                | 0.00E+00 | 0.00E+00  | 0.00E+00  | 4                               | 2.82E-03 | -5.87E+00 | -1.65E-02 | 0                 | 0.00E+00 | 0.00E+00  | 0.00E+00  |
|            | Diptera 8      | 5                                | 4.39E-02 | -3.13E+00 | -1.37E-01 | 25                              | 1.76E-02 | -4.04E+00 | -7.11E-02 | 11                | 4.23E-02 | -3.16E+00 | -1.34E-01 |
|            | Diptera 9      | 1                                | 8.77E-03 | -4.74E+00 | -4.15E-02 | 3                               | 2.11E-03 | -6.16E+00 | -1.30E-02 | 0                 | 0.00E+00 | 0.00E+00  | 0.00E+00  |
|            | Diptera 10     | 0                                | 0.00E+00 | 0.00E+00  | 0.00E+00  | 5                               | 3.52E-03 | -5.65E+00 | -1.99E-02 | 0                 | 0.00E+00 | 0.00E+00  | 0.00E+00  |
|            | Diptera 11     | 0                                | 0.00E+00 | 0.00E+00  | 0.00E+00  | 40                              | 2.82E-02 | -3.57E+00 | -1.01E-01 | 2                 | 7.69E-03 | -4.87E+00 | -3.74E-02 |

**Table S2.** Data used for the calculation of the Shannon-Wiener index.

|            |   |          |           |           |    |          |           |           |   |          |           |           |
|------------|---|----------|-----------|-----------|----|----------|-----------|-----------|---|----------|-----------|-----------|
| Diptera 12 | 4 | 3.51E-02 | -3.35E+00 | -1.18E-01 | 12 | 8.45E-03 | -4.77E+00 | -4.03E-02 | 2 | 7.69E-03 | -4.87E+00 | -3.74E-02 |
| Diptera 13 | 0 | 0.00E+00 | 0.00E+00  | 0.00E+00  | 19 | 1.34E-02 | -4.31E+00 | -5.77E-02 | 1 | 3.85E-03 | -5.56E+00 | -2.14E-02 |
| Diptera 14 | 0 | 0.00E+00 | 0.00E+00  | 0.00E+00  | 8  | 5.63E-03 | -5.18E+00 | -2.92E-02 | 1 | 3.85E-03 | -5.56E+00 | -2.14E-02 |
| Diptera 15 | 0 | 0.00E+00 | 0.00E+00  | 0.00E+00  | 3  | 2.11E-03 | -6.16E+00 | -1.30E-02 | 1 | 3.85E-03 | -5.56E+00 | -2.14E-02 |
| Diptera 16 | 0 | 0.00E+00 | 0.00E+00  | 0.00E+00  | 4  | 2.82E-03 | -5.87E+00 | -1.65E-02 | 0 | 0.00E+00 | 0.00E+00  | 0.00E+00  |
| Diptera 17 | 1 | 8.77E-03 | -4.74E+00 | -4.15E-02 | 8  | 5.63E-03 | -5.18E+00 | -2.92E-02 | 0 | 0.00E+00 | 0.00E+00  | 0.00E+00  |
| Diptera 18 | 1 | 8.77E-03 | -4.74E+00 | -4.15E-02 | 13 | 9.15E-03 | -4.69E+00 | -4.30E-02 | 0 | 0.00E+00 | 0.00E+00  | 0.00E+00  |
| Diptera 19 | 0 | 0.00E+00 | 0.00E+00  | 0.00E+00  | 26 | 1.83E-02 | -4.00E+00 | -7.32E-02 | 3 | 1.15E-02 | -4.46E+00 | -5.15E-02 |
| Diptera 20 | 0 | 0.00E+00 | 0.00E+00  | 0.00E+00  | 12 | 8.45E-03 | -4.77E+00 | -4.03E-02 | 1 | 3.85E-03 | -5.56E+00 | -2.14E-02 |
| Diptera 21 | 0 | 0.00E+00 | 0.00E+00  | 0.00E+00  | 11 | 7.75E-03 | -4.86E+00 | -3.77E-02 | 1 | 3.85E-03 | -5.56E+00 | -2.14E-02 |
| Diptera 22 | 0 | 0.00E+00 | 0.00E+00  | 0.00E+00  | 3  | 2.11E-03 | -6.16E+00 | -1.30E-02 | 0 | 0.00E+00 | 0.00E+00  | 0.00E+00  |
| Diptera 23 | 5 | 4.39E-02 | -3.13E+00 | -1.37E-01 | 5  | 3.52E-03 | -5.65E+00 | -1.99E-02 | 0 | 0.00E+00 | 0.00E+00  | 0.00E+00  |
| Diptera 24 | 0 | 0.00E+00 | 0.00E+00  | 0.00E+00  | 8  | 5.63E-03 | -5.18E+00 | -2.92E-02 | 0 | 0.00E+00 | 0.00E+00  | 0.00E+00  |
| Diptera 25 | 0 | 0.00E+00 | 0.00E+00  | 0.00E+00  | 2  | 1.41E-03 | -6.57E+00 | -9.25E-03 | 0 | 0.00E+00 | 0.00E+00  | 0.00E+00  |
| Diptera 26 | 0 | 0.00E+00 | 0.00E+00  | 0.00E+00  | 15 | 1.06E-02 | -4.55E+00 | -4.81E-02 | 3 | 1.15E-02 | -4.46E+00 | -5.15E-02 |
| Diptera 27 | 0 | 0.00E+00 | 0.00E+00  | 0.00E+00  | 0  | 0.00E+00 | 0.00E+00  | 0.00E+00  | 1 | 3.85E-03 | -5.56E+00 | -2.14E-02 |
| Diptera 28 | 0 | 0.00E+00 | 0.00E+00  | 0.00E+00  | 7  | 4.93E-03 | -5.31E+00 | -2.62E-02 | 0 | 0.00E+00 | 0.00E+00  | 0.00E+00  |
| Diptera 29 | 0 | 0.00E+00 | 0.00E+00  | 0.00E+00  | 1  | 7.04E-04 | -7.26E+00 | -5.11E-03 | 0 | 0.00E+00 | 0.00E+00  | 0.00E+00  |
| Diptera 30 | 0 | 0.00E+00 | 0.00E+00  | 0.00E+00  | 19 | 1.34E-02 | -4.31E+00 | -5.77E-02 | 0 | 0.00E+00 | 0.00E+00  | 0.00E+00  |
| Diptera 31 | 1 | 8.77E-03 | -4.74E+00 | -4.15E-02 | 17 | 1.20E-02 | -4.43E+00 | -5.30E-02 | 0 | 0.00E+00 | 0.00E+00  | 0.00E+00  |
| Diptera 32 | 1 | 8.77E-03 | -4.74E+00 | -4.15E-02 | 7  | 4.93E-03 | -5.31E+00 | -2.62E-02 | 1 | 3.85E-03 | -5.56E+00 | -2.14E-02 |
| Diptera 33 | 0 | 0.00E+00 | 0.00E+00  | 0.00E+00  | 6  | 4.23E-03 | -5.47E+00 | -2.31E-02 | 1 | 3.85E-03 | -5.56E+00 | -2.14E-02 |
| Diptera 34 | 0 | 0.00E+00 | 0.00E+00  | 0.00E+00  | 3  | 2.11E-03 | -6.16E+00 | -1.30E-02 | 0 | 0.00E+00 | 0.00E+00  | 0.00E+00  |
| Diptera 35 | 0 | 0.00E+00 | 0.00E+00  | 0.00E+00  | 4  | 2.82E-03 | -5.87E+00 | -1.65E-02 | 2 | 7.69E-03 | -4.87E+00 | -3.74E-02 |
| Diptera 36 | 0 | 0.00E+00 | 0.00E+00  | 0.00E+00  | 3  | 2.11E-03 | -6.16E+00 | -1.30E-02 | 1 | 3.85E-03 | -5.56E+00 | -2.14E-02 |
| Diptera 37 | 0 | 0.00E+00 | 0.00E+00  | 0.00E+00  | 1  | 7.04E-04 | -7.26E+00 | -5.11E-03 | 3 | 1.15E-02 | -4.46E+00 | -5.15E-02 |
| Diptera 38 | 0 | 0.00E+00 | 0.00E+00  | 0.00E+00  | 5  | 3.52E-03 | -5.65E+00 | -1.99E-02 | 1 | 3.85E-03 | -5.56E+00 | -2.14E-02 |
| Diptera 39 | 0 | 0.00E+00 | 0.00E+00  | 0.00E+00  | 5  | 3.52E-03 | -5.65E+00 | -1.99E-02 | 0 | 0.00E+00 | 0.00E+00  | 0.00E+00  |

**Table S2.** Data used for the calculation of the Shannon-Wiener index.

|           |             |   |          |           |           |    |          |           |           |   |          |           |           |
|-----------|-------------|---|----------|-----------|-----------|----|----------|-----------|-----------|---|----------|-----------|-----------|
| Hemiptera | Diptera 40  | 0 | 0.00E+00 | 0.00E+00  | 0.00E+00  | 2  | 1.41E-03 | -6.57E+00 | -9.25E-03 | 0 | 0.00E+00 | 0.00E+00  | 0.00E+00  |
|           | Diptera 41  | 1 | 8.77E-03 | -4.74E+00 | -4.15E-02 | 13 | 9.15E-03 | -4.69E+00 | -4.30E-02 | 0 | 0.00E+00 | 0.00E+00  | 0.00E+00  |
|           | Diptera 42  | 0 | 0.00E+00 | 0.00E+00  | 0.00E+00  | 7  | 4.93E-03 | -5.31E+00 | -2.62E-02 | 0 | 0.00E+00 | 0.00E+00  | 0.00E+00  |
|           | Diptera 43  | 0 | 0.00E+00 | 0.00E+00  | 0.00E+00  | 2  | 1.41E-03 | -6.57E+00 | -9.25E-03 | 0 | 0.00E+00 | 0.00E+00  | 0.00E+00  |
|           | Diptera 44  | 0 | 0.00E+00 | 0.00E+00  | 0.00E+00  | 7  | 4.93E-03 | -5.31E+00 | -2.62E-02 | 0 | 0.00E+00 | 0.00E+00  | 0.00E+00  |
|           | Diptera 45  | 0 | 0.00E+00 | 0.00E+00  | 0.00E+00  | 4  | 2.82E-03 | -5.87E+00 | -1.65E-02 | 0 | 0.00E+00 | 0.00E+00  | 0.00E+00  |
|           | Diptera 46  | 0 | 0.00E+00 | 0.00E+00  | 0.00E+00  | 1  | 7.04E-04 | -7.26E+00 | -5.11E-03 | 0 | 0.00E+00 | 0.00E+00  | 0.00E+00  |
|           | Diptera 47  | 2 | 1.75E-02 | -4.04E+00 | -7.09E-02 | 8  | 5.63E-03 | -5.18E+00 | -2.92E-02 | 5 | 1.92E-02 | -3.95E+00 | -7.60E-02 |
|           | Diptera 48  | 0 | 0.00E+00 | 0.00E+00  | 0.00E+00  | 1  | 7.04E-04 | -7.26E+00 | -5.11E-03 | 0 | 0.00E+00 | 0.00E+00  | 0.00E+00  |
|           | Diptera 49  | 0 | 0.00E+00 | 0.00E+00  | 0.00E+00  | 3  | 2.11E-03 | -6.16E+00 | -1.30E-02 | 0 | 0.00E+00 | 0.00E+00  | 0.00E+00  |
|           | Diptera 50  | 0 | 0.00E+00 | 0.00E+00  | 0.00E+00  | 5  | 3.52E-03 | -5.65E+00 | -1.99E-02 | 1 | 3.85E-03 | -5.56E+00 | -2.14E-02 |
|           | Diptera 51  | 1 | 8.77E-03 | -4.74E+00 | -4.15E-02 | 0  | 0.00E+00 | 0.00E+00  | 0.00E+00  | 1 | 3.85E-03 | -5.56E+00 | -2.14E-02 |
|           | Diptera 52  | 0 | 0.00E+00 | 0.00E+00  | 0.00E+00  | 6  | 4.23E-03 | -5.47E+00 | -2.31E-02 | 0 | 0.00E+00 | 0.00E+00  | 0.00E+00  |
|           | Diptera 53  | 0 | 0.00E+00 | 0.00E+00  | 0.00E+00  | 21 | 1.48E-02 | -4.21E+00 | -6.23E-02 | 3 | 1.15E-02 | -4.46E+00 | -5.15E-02 |
|           | Diptera 54  | 0 | 0.00E+00 | 0.00E+00  | 0.00E+00  | 8  | 5.63E-03 | -5.18E+00 | -2.92E-02 | 1 | 3.85E-03 | -5.56E+00 | -2.14E-02 |
|           | Diptera 55  | 1 | 8.77E-03 | -4.74E+00 | -4.15E-02 | 7  | 4.93E-03 | -5.31E+00 | -2.62E-02 | 4 | 1.54E-02 | -4.17E+00 | -6.42E-02 |
|           | Diptera 56  | 0 | 0.00E+00 | 0.00E+00  | 0.00E+00  | 2  | 1.41E-03 | -6.57E+00 | -9.25E-03 | 0 | 0.00E+00 | 0.00E+00  | 0.00E+00  |
|           | Diptera 57  | 0 | 0.00E+00 | 0.00E+00  | 0.00E+00  | 5  | 3.52E-03 | -5.65E+00 | -1.99E-02 | 1 | 3.85E-03 | -5.56E+00 | -2.14E-02 |
|           | Diptera 58  | 0 | 0.00E+00 | 0.00E+00  | 0.00E+00  | 2  | 1.41E-03 | -6.57E+00 | -9.25E-03 | 1 | 3.85E-03 | -5.56E+00 | -2.14E-02 |
|           | Diptera 59  | 0 | 0.00E+00 | 0.00E+00  | 0.00E+00  | 2  | 1.41E-03 | -6.57E+00 | -9.25E-03 | 0 | 0.00E+00 | 0.00E+00  | 0.00E+00  |
|           | Diptera 60  | 0 | 0.00E+00 | 0.00E+00  | 0.00E+00  | 3  | 2.11E-03 | -6.16E+00 | -1.30E-02 | 0 | 0.00E+00 | 0.00E+00  | 0.00E+00  |
|           | Diptera 61  | 0 | 0.00E+00 | 0.00E+00  | 0.00E+00  | 1  | 7.04E-04 | -7.26E+00 | -5.11E-03 | 2 | 7.69E-03 | -4.87E+00 | -3.74E-02 |
|           | Hemiptera 1 | 2 | 1.75E-02 | -4.04E+00 | -7.09E-02 | 86 | 6.06E-02 | -2.80E+00 | -1.70E-01 | 8 | 3.08E-02 | -3.48E+00 | -1.07E-01 |
|           | Hemiptera 2 | 0 | 0.00E+00 | 0.00E+00  | 0.00E+00  | 3  | 2.11E-03 | -6.16E+00 | -1.30E-02 | 1 | 3.85E-03 | -5.56E+00 | -2.14E-02 |
|           | Hemiptera 3 | 0 | 0.00E+00 | 0.00E+00  | 0.00E+00  | 50 | 3.52E-02 | -3.35E+00 | -1.18E-01 | 5 | 1.92E-02 | -3.95E+00 | -7.60E-02 |
|           | Hemiptera 4 | 6 | 5.26E-02 | -2.94E+00 | -1.55E-01 | 29 | 2.04E-02 | -3.89E+00 | -7.95E-02 | 2 | 7.69E-03 | -4.87E+00 | -3.74E-02 |
|           | Hemiptera 5 | 3 | 2.63E-02 | -3.64E+00 | -9.57E-02 | 3  | 2.11E-03 | -6.16E+00 | -1.30E-02 | 3 | 1.15E-02 | -4.46E+00 | -5.15E-02 |
|           | Hemiptera 6 | 0 | 0.00E+00 | 0.00E+00  | 0.00E+00  | 21 | 1.48E-02 | -4.21E+00 | -6.23E-02 | 0 | 0.00E+00 | 0.00E+00  | 0.00E+00  |

**Table S2.** Data used for the calculation of the Shannon-Wiener index.

|             |               |   |          |           |           |    |          |           |           |   |          |           |           |
|-------------|---------------|---|----------|-----------|-----------|----|----------|-----------|-----------|---|----------|-----------|-----------|
|             | Hemiptera 7   | 2 | 1.75E-02 | -4.04E+00 | -7.09E-02 | 41 | 2.89E-02 | -3.54E+00 | -1.02E-01 | 2 | 7.69E-03 | -4.87E+00 | -3.74E-02 |
|             | Hemiptera 8   | 0 | 0.00E+00 | 0.00E+00  | 0.00E+00  | 4  | 2.82E-03 | -5.87E+00 | -1.65E-02 | 1 | 3.85E-03 | -5.56E+00 | -2.14E-02 |
|             | Hemiptera 9   | 0 | 0.00E+00 | 0.00E+00  | 0.00E+00  | 61 | 4.30E-02 | -3.15E+00 | -1.35E-01 | 1 | 3.85E-03 | -5.56E+00 | -2.14E-02 |
|             | Hemiptera 10  | 0 | 0.00E+00 | 0.00E+00  | 0.00E+00  | 5  | 3.52E-03 | -5.65E+00 | -1.99E-02 | 0 | 0.00E+00 | 0.00E+00  | 0.00E+00  |
|             | Hemiptera 11  | 1 | 8.77E-03 | -4.74E+00 | -4.15E-02 | 3  | 2.11E-03 | -6.16E+00 | -1.30E-02 | 1 | 3.85E-03 | -5.56E+00 | -2.14E-02 |
|             | Hemiptera 12  | 0 | 0.00E+00 | 0.00E+00  | 0.00E+00  | 16 | 1.13E-02 | -4.49E+00 | -5.05E-02 | 1 | 3.85E-03 | -5.56E+00 | -2.14E-02 |
|             | Hemiptera 13  | 0 | 0.00E+00 | 0.00E+00  | 0.00E+00  | 0  | 0.00E+00 | 0.00E+00  | 0.00E+00  | 1 | 3.85E-03 | -5.56E+00 | -2.14E-02 |
|             | Hemiptera 14  | 1 | 8.77E-03 | -4.74E+00 | -4.15E-02 | 1  | 7.04E-04 | -7.26E+00 | -5.11E-03 | 0 | 0.00E+00 | 0.00E+00  | 0.00E+00  |
|             | Hemiptera 15  | 0 | 0.00E+00 | 0.00E+00  | 0.00E+00  | 4  | 2.82E-03 | -5.87E+00 | -1.65E-02 | 0 | 0.00E+00 | 0.00E+00  | 0.00E+00  |
|             | Hemiptera 16  | 1 | 8.77E-03 | -4.74E+00 | -4.15E-02 | 1  | 7.04E-04 | -7.26E+00 | -5.11E-03 | 0 | 0.00E+00 | 0.00E+00  | 0.00E+00  |
|             | Hemiptera 17  | 0 | 0.00E+00 | 0.00E+00  | 0.00E+00  | 2  | 1.41E-03 | -6.57E+00 | -9.25E-03 | 0 | 0.00E+00 | 0.00E+00  | 0.00E+00  |
|             | Hemiptera 18  | 0 | 0.00E+00 | 0.00E+00  | 0.00E+00  | 2  | 1.41E-03 | -6.57E+00 | -9.25E-03 | 0 | 0.00E+00 | 0.00E+00  | 0.00E+00  |
|             | Hemiptera 19  | 0 | 0.00E+00 | 0.00E+00  | 0.00E+00  | 6  | 4.23E-03 | -5.47E+00 | -2.31E-02 | 0 | 0.00E+00 | 0.00E+00  | 0.00E+00  |
|             | Hemiptera 20  | 0 | 0.00E+00 | 0.00E+00  | 0.00E+00  | 2  | 1.41E-03 | -6.57E+00 | -9.25E-03 | 0 | 0.00E+00 | 0.00E+00  | 0.00E+00  |
|             | Hemiptera 21  | 0 | 0.00E+00 | 0.00E+00  | 0.00E+00  | 3  | 2.11E-03 | -6.16E+00 | -1.30E-02 | 0 | 0.00E+00 | 0.00E+00  | 0.00E+00  |
|             | Hemiptera 22  | 0 | 0.00E+00 | 0.00E+00  | 0.00E+00  | 18 | 1.27E-02 | -4.37E+00 | -5.54E-02 | 1 | 3.85E-03 | -5.56E+00 | -2.14E-02 |
|             | Hemiptera 23  | 0 | 0.00E+00 | 0.00E+00  | 0.00E+00  | 2  | 1.41E-03 | -6.57E+00 | -9.25E-03 | 0 | 0.00E+00 | 0.00E+00  | 0.00E+00  |
|             | Hemiptera 24  | 0 | 0.00E+00 | 0.00E+00  | 0.00E+00  | 4  | 2.82E-03 | -5.87E+00 | -1.65E-02 | 0 | 0.00E+00 | 0.00E+00  | 0.00E+00  |
|             | Hemiptera 25  | 0 | 0.00E+00 | 0.00E+00  | 0.00E+00  | 29 | 2.04E-02 | -3.89E+00 | -7.95E-02 | 1 | 3.85E-03 | -5.56E+00 | -2.14E-02 |
|             | Hemiptera 26  | 0 | 0.00E+00 | 0.00E+00  | 0.00E+00  | 11 | 7.75E-03 | -4.86E+00 | -3.77E-02 | 0 | 0.00E+00 | 0.00E+00  | 0.00E+00  |
|             | Hemiptera 27  | 0 | 0.00E+00 | 0.00E+00  | 0.00E+00  | 3  | 2.11E-03 | -6.16E+00 | -1.30E-02 | 0 | 0.00E+00 | 0.00E+00  | 0.00E+00  |
|             | Hemiptera 28  | 0 | 0.00E+00 | 0.00E+00  | 0.00E+00  | 1  | 7.04E-04 | -7.26E+00 | -5.11E-03 | 0 | 0.00E+00 | 0.00E+00  | 0.00E+00  |
| Himenoptera | Himenoptera 1 | 0 | 0.00E+00 | 0.00E+00  | 0.00E+00  | 2  | 1.41E-03 | -6.57E+00 | -9.25E-03 | 0 | 0.00E+00 | 0.00E+00  | 0.00E+00  |
|             | Himenoptera 2 | 0 | 0.00E+00 | 0.00E+00  | 0.00E+00  | 6  | 4.23E-03 | -5.47E+00 | -2.31E-02 | 0 | 0.00E+00 | 0.00E+00  | 0.00E+00  |
|             | Himenoptera 3 | 0 | 0.00E+00 | 0.00E+00  | 0.00E+00  | 2  | 1.41E-03 | -6.57E+00 | -9.25E-03 | 0 | 0.00E+00 | 0.00E+00  | 0.00E+00  |
|             | Himenoptera 4 | 1 | 8.77E-03 | -4.74E+00 | -4.15E-02 | 1  | 7.04E-04 | -7.26E+00 | -5.11E-03 | 2 | 7.69E-03 | -4.87E+00 | -3.74E-02 |
|             | Himenoptera 5 | 0 | 0.00E+00 | 0.00E+00  | 0.00E+00  | 4  | 2.82E-03 | -5.87E+00 | -1.65E-02 | 1 | 3.85E-03 | -5.56E+00 | -2.14E-02 |
|             | Himenoptera 6 | 0 | 0.00E+00 | 0.00E+00  | 0.00E+00  | 5  | 3.52E-03 | -5.65E+00 | -1.99E-02 | 0 | 0.00E+00 | 0.00E+00  | 0.00E+00  |

**Table S2.** Data used for the calculation of the Shannon-Wiener index.

|             |                |   |          |           |           |    |          |           |           |   |          |           |           |
|-------------|----------------|---|----------|-----------|-----------|----|----------|-----------|-----------|---|----------|-----------|-----------|
| Lepidoptera | Himenoptera 7  | 1 | 8.77E-03 | -4.74E+00 | -4.15E-02 | 1  | 7.04E-04 | -7.26E+00 | -5.11E-03 | 0 | 0.00E+00 | 0.00E+00  | 0.00E+00  |
|             | Himenoptera 8  | 0 | 0.00E+00 | 0.00E+00  | 0.00E+00  | 2  | 1.41E-03 | -6.57E+00 | -9.25E-03 | 1 | 3.85E-03 | -5.56E+00 | -2.14E-02 |
|             | Himenoptera 9  | 0 | 0.00E+00 | 0.00E+00  | 0.00E+00  | 4  | 2.82E-03 | -5.87E+00 | -1.65E-02 | 2 | 7.69E-03 | -4.87E+00 | -3.74E-02 |
|             | Himenoptera 10 | 0 | 0.00E+00 | 0.00E+00  | 0.00E+00  | 4  | 2.82E-03 | -5.87E+00 | -1.65E-02 | 1 | 3.85E-03 | -5.56E+00 | -2.14E-02 |
|             | Himenoptera 11 | 1 | 8.77E-03 | -4.74E+00 | -4.15E-02 | 0  | 0.00E+00 | 0.00E+00  | 0.00E+00  | 0 | 0.00E+00 | 0.00E+00  | 0.00E+00  |
|             | Himenoptera 12 | 2 | 1.75E-02 | -4.04E+00 | -7.09E-02 | 1  | 7.04E-04 | -7.26E+00 | -5.11E-03 | 0 | 0.00E+00 | 0.00E+00  | 0.00E+00  |
|             | Himenoptera 13 | 0 | 0.00E+00 | 0.00E+00  | 0.00E+00  | 1  | 7.04E-04 | -7.26E+00 | -5.11E-03 | 1 | 3.85E-03 | -5.56E+00 | -2.14E-02 |
|             | Himenoptera 14 | 0 | 0.00E+00 | 0.00E+00  | 0.00E+00  | 1  | 7.04E-04 | -7.26E+00 | -5.11E-03 | 0 | 0.00E+00 | 0.00E+00  | 0.00E+00  |
|             | Lepidoptera 1  | 0 | 0.00E+00 | 0.00E+00  | 0.00E+00  | 1  | 7.04E-04 | -7.26E+00 | -5.11E-03 | 0 | 0.00E+00 | 0.00E+00  | 0.00E+00  |
|             | Lepidoptera 2  | 0 | 0.00E+00 | 0.00E+00  | 0.00E+00  | 2  | 1.41E-03 | -6.57E+00 | -9.25E-03 | 0 | 0.00E+00 | 0.00E+00  | 0.00E+00  |
|             | Lepidoptera 3  | 1 | 8.77E-03 | -4.74E+00 | -4.15E-02 | 11 | 7.75E-03 | -4.86E+00 | -3.77E-02 | 0 | 0.00E+00 | 0.00E+00  | 0.00E+00  |
|             | Lepidoptera 4  | 1 | 8.77E-03 | -4.74E+00 | -4.15E-02 | 7  | 4.93E-03 | -5.31E+00 | -2.62E-02 | 0 | 0.00E+00 | 0.00E+00  | 0.00E+00  |
|             | Lepidoptera 5  | 0 | 0.00E+00 | 0.00E+00  | 0.00E+00  | 2  | 1.41E-03 | -6.57E+00 | -9.25E-03 | 0 | 0.00E+00 | 0.00E+00  | 0.00E+00  |
|             | Lepidoptera 6  | 2 | 1.75E-02 | -4.04E+00 | -7.09E-02 | 1  | 7.04E-04 | -7.26E+00 | -5.11E-03 | 0 | 0.00E+00 | 0.00E+00  | 0.00E+00  |
|             | Lepidoptera 7  | 0 | 0.00E+00 | 0.00E+00  | 0.00E+00  | 2  | 1.41E-03 | -6.57E+00 | -9.25E-03 | 0 | 0.00E+00 | 0.00E+00  | 0.00E+00  |
|             | Lepidoptera 8  | 0 | 0.00E+00 | 0.00E+00  | 0.00E+00  | 1  | 7.04E-04 | -7.26E+00 | -5.11E-03 | 0 | 0.00E+00 | 0.00E+00  | 0.00E+00  |
|             | Lepidoptera 9  | 0 | 0.00E+00 | 0.00E+00  | 0.00E+00  | 13 | 9.15E-03 | -4.69E+00 | -4.30E-02 | 0 | 0.00E+00 | 0.00E+00  | 0.00E+00  |
|             | Lepidoptera 10 | 0 | 0.00E+00 | 0.00E+00  | 0.00E+00  | 3  | 2.11E-03 | -6.16E+00 | -1.30E-02 | 0 | 0.00E+00 | 0.00E+00  | 0.00E+00  |
|             | Lepidoptera 11 | 0 | 0.00E+00 | 0.00E+00  | 0.00E+00  | 1  | 7.04E-04 | -7.26E+00 | -5.11E-03 | 0 | 0.00E+00 | 0.00E+00  | 0.00E+00  |
|             | Lepidoptera 12 | 0 | 0.00E+00 | 0.00E+00  | 0.00E+00  | 3  | 2.11E-03 | -6.16E+00 | -1.30E-02 | 0 | 0.00E+00 | 0.00E+00  | 0.00E+00  |
|             | Lepidoptera 13 | 0 | 0.00E+00 | 0.00E+00  | 0.00E+00  | 6  | 4.23E-03 | -5.47E+00 | -2.31E-02 | 0 | 0.00E+00 | 0.00E+00  | 0.00E+00  |
|             | Lepidoptera 14 | 0 | 0.00E+00 | 0.00E+00  | 0.00E+00  | 1  | 7.04E-04 | -7.26E+00 | -5.11E-03 | 0 | 0.00E+00 | 0.00E+00  | 0.00E+00  |
|             | Lepidoptera 15 | 0 | 0.00E+00 | 0.00E+00  | 0.00E+00  | 1  | 7.04E-04 | -7.26E+00 | -5.11E-03 | 0 | 0.00E+00 | 0.00E+00  | 0.00E+00  |
|             | Lepidoptera 16 | 0 | 0.00E+00 | 0.00E+00  | 0.00E+00  | 3  | 2.11E-03 | -6.16E+00 | -1.30E-02 | 0 | 0.00E+00 | 0.00E+00  | 0.00E+00  |
|             | Lepidoptera 17 | 0 | 0.00E+00 | 0.00E+00  | 0.00E+00  | 2  | 1.41E-03 | -6.57E+00 | -9.25E-03 | 0 | 0.00E+00 | 0.00E+00  | 0.00E+00  |
|             | Lepidoptera 18 | 0 | 0.00E+00 | 0.00E+00  | 0.00E+00  | 1  | 7.04E-04 | -7.26E+00 | -5.11E-03 | 0 | 0.00E+00 | 0.00E+00  | 0.00E+00  |
|             | Lepidoptera 19 | 0 | 0.00E+00 | 0.00E+00  | 0.00E+00  | 2  | 1.41E-03 | -6.57E+00 | -9.25E-03 | 0 | 0.00E+00 | 0.00E+00  | 0.00E+00  |
|             | Lepidoptera 20 | 0 | 0.00E+00 | 0.00E+00  | 0.00E+00  | 1  | 7.04E-04 | -7.26E+00 | -5.11E-03 | 0 | 0.00E+00 | 0.00E+00  | 0.00E+00  |



**Table S2.** Data used for the calculation of the Shannon-Wiener index.

|                      |                |                                  |          |           |           |      |                                 |           |           |     |          |           |           |      |
|----------------------|----------------|----------------------------------|----------|-----------|-----------|------|---------------------------------|-----------|-----------|-----|----------|-----------|-----------|------|
|                      | Lepidoptera 21 | 0                                | 0.00E+00 | 0.00E+00  | 0.00E+00  | 1    | 7.04E-04                        | -7.26E+00 | -5.11E-03 | 0   | 0.00E+00 | 0.00E+00  | 0.00E+00  |      |
|                      | Lepidoptera 22 | 0                                | 0.00E+00 | 0.00E+00  | 0.00E+00  | 3    | 2.11E-03                        | -6.16E+00 | -1.30E-02 | 0   | 0.00E+00 | 0.00E+00  | 0.00E+00  |      |
|                      | Lepidoptera 23 | 0                                | 0.00E+00 | 0.00E+00  | 0.00E+00  | 2    | 1.41E-03                        | -6.57E+00 | -9.25E-03 | 0   | 0.00E+00 | 0.00E+00  | 0.00E+00  |      |
| Neuroptera           | Neuroptera 1   | 0                                | 0.00E+00 | 0.00E+00  | 0.00E+00  | 6    | 4.23E-03                        | -5.47E+00 | -2.31E-02 | 0   | 0.00E+00 | 0.00E+00  | 0.00E+00  |      |
| Psocoptera           | Psocoptera 1   | 1                                | 8.77E-03 | -4.74E+00 | -4.15E-02 | 6    | 4.23E-03                        | -5.47E+00 | -2.31E-02 | 9   | 3.46E-02 | -3.36E+00 | -1.16E-01 |      |
|                      | Psocoptera 2   | 3                                | 2.63E-02 | -3.64E+00 | -9.57E-02 | 88   | 6.20E-02                        | -2.78E+00 | -1.72E-01 | 92  | 3.54E-01 | -1.04E+00 | -3.68E-01 |      |
|                      | Psocoptera 3   | 1                                | 8.77E-03 | -4.74E+00 | -4.15E-02 | 13   | 9.15E-03                        | -4.69E+00 | -4.30E-02 | 12  | 4.62E-02 | -3.08E+00 | -1.42E-01 |      |
|                      | Psocoptera 4   | 0                                | 0.00E+00 | 0.00E+00  | 0.00E+00  | 6    | 4.23E-03                        | -5.47E+00 | -2.31E-02 | 3   | 1.15E-02 | -4.46E+00 | -5.15E-02 |      |
|                      | Psocoptera 5   | 2                                | 1.75E-02 | -4.04E+00 | -7.09E-02 | 14   | 9.86E-03                        | -4.62E+00 | -4.55E-02 | 6   | 2.31E-02 | -3.77E+00 | -8.70E-02 |      |
|                      | Psocoptera 6   | 0                                | 0.00E+00 | 0.00E+00  | 0.00E+00  | 4    | 2.82E-03                        | -5.87E+00 | -1.65E-02 | 5   | 1.92E-02 | -3.95E+00 | -7.60E-02 |      |
|                      | Psocoptera 7   | 0                                | 0.00E+00 | 0.00E+00  | 0.00E+00  | 1    | 7.04E-04                        | -7.26E+00 | -5.11E-03 | 1   | 3.85E-03 | -5.56E+00 | -2.14E-02 |      |
|                      | Psocoptera 8   | 0                                | 0.00E+00 | 0.00E+00  | 0.00E+00  | 1    | 7.04E-04                        | -7.26E+00 | -5.11E-03 | 0   | 0.00E+00 | 0.00E+00  | 0.00E+00  |      |
| Thysanoptera         | Thysanoptera 1 | 0                                | 0.00E+00 | 0.00E+00  | 0.00E+00  | 0    | 0.00E+00                        | 0.00E+00  | 0.00E+00  | 2   | 7.69E-03 | -4.87E+00 | -3.74E-02 |      |
|                      | Thysanoptera 2 | 1                                | 8.77E-03 | -4.74E+00 | -4.15E-02 | 0    | 0.00E+00                        | 0.00E+00  | 0.00E+00  | 0   | 0.00E+00 | 0.00E+00  | 0.00E+00  |      |
|                      | Thysanoptera 3 | 0                                | 0.00E+00 | 0.00E+00  | 0.00E+00  | 0    | 0.00E+00                        | 0.00E+00  | 0.00E+00  | 1   | 3.85E-03 | -5.56E+00 | -2.14E-02 |      |
| Trichoptera          | Trichoptera 1  | 0                                | 0.00E+00 | 0.00E+00  | 0.00E+00  | 4    | 2.82E-03                        | -5.87E+00 | -1.65E-02 | 0   | 0.00E+00 | 0.00E+00  | 0.00E+00  |      |
|                      | Trichoptera 2  | 0                                | 0.00E+00 | 0.00E+00  | 0.00E+00  | 1    | 7.04E-04                        | -7.26E+00 | -5.11E-03 | 0   | 0.00E+00 | 0.00E+00  | 0.00E+00  |      |
|                      | Trichoptera 3  | 0                                | 0.00E+00 | 0.00E+00  | 0.00E+00  | 1    | 7.04E-04                        | -7.26E+00 | -5.11E-03 | 0   | 0.00E+00 | 0.00E+00  | 0.00E+00  |      |
| Total                |                | 114                              |          |           |           | 1420 |                                 |           |           | 260 |          |           |           |      |
| Shannon-Wiener Index |                | Negative control (Unilluminated) |          |           |           | 2.80 | Positive control (Metal halide) |           |           |     | 4.07     | CromaLux  |           | 2.95 |
